# Supplementary material for: Design and synthesis of integrally structured Ni3N nanosheets/carbon microfibers/Ni3N nanosheets for efficient full water splitting catalysis
Source: Royal Society of Chemistry journal article supplement (doi:10.1039/c7ta02217d), 2017-01-01
Supplement: c7ta02217d1.pdf [file c7ta02217d1.pdf]

## Supporting Information

### Design and Synthesis of Integrally Structured Ni<sub>3</sub>N Nanosheets/Carbon Microfibers/Ni<sub>3</sub>N Nanosheets for the Efficient Full Water Splitting Catalysis

Tingting Liu,<sup>a</sup> Mian Li,<sup>a</sup> Chuanlai Jiao,<sup>a</sup> Mehboob Hassan,<sup>a</sup> Xiangjie Bo,<sup>\*a</sup> Ming Zhou,<sup>\*a</sup> and Hsing-Lin Wang<sup>\*b</sup>

<sup>a</sup> Key Laboratory of Nanobiosensing and Nanobioanalysis at Universities of Jilin Province, Key Laboratory of Polyoxometalate Science of Ministry of Education, and National & Local United Engineering Laboratory for Power Batteries, Department of Chemistry, Northeast Normal University, Changchun, Jilin Province 130024, P. R. China. E-mail: [baoxj133@nenu.edu.cn](mailto:baoxj133@nenu.edu.cn); [zhoum739@nenu.edu.cn](mailto:zhoum739@nenu.edu.cn)

<sup>b</sup> Department of Materials Science & Engineering, Southern University of Science & Technology, Shenzhen, Guangdong 518055, P.R. China. E-mail: [wangxl3@sustc.edu.cn](mailto:wangxl3@sustc.edu.cn)

## 1. Experimental Section

### 1.1. Reagents

Hexamethylenetetramine (HMT), nickel acetate, Nafion solution (5 wt%), KOH, absolute ethyl alcohol, and carbon nanotubes (CNTs) were purchased from Aladdin.  $\text{NH}_3$  was purchased from Juyang Gas Company, Changchun, China. All other reagents were analytical grade and without further purification.

### 1.2. Synthesis of the carbon matrix of GO, CNTs, MPCs and CMFs

The GO was synthesized from primary graphite particles by the Hummer's method.<sup>1</sup> CNTs was washed with 68 wt%  $\text{HNO}_3$  solution at 120 °C for 12 h to open their ends and activate the surfaces. After being washed with deionized water to neutral state, the CNTs were dried at 80 °C in oven. MPCs was synthesized by previous method,<sup>2</sup> in which the commercial hydrophilic nano- $\text{CaCO}_3$  and sucrose act as template and act carbon precursor, respectively. CMFs were derived from forwards collected biomass (catkins) as reported previously by us.<sup>3</sup>

### 1.3. Synthesis of the Ni-based precursors for $\text{Ni}_3\text{N}$ -CNTs, $\text{Ni}_3\text{N}$ -Gr, $\text{Ni}_3\text{N}$ -MPCs, $\text{Ni}_3\text{N}$ /CMFs/ $\text{Ni}_3\text{N}$ and bulk $\text{Ni}_3\text{N}$

The detailed synthetic route for producing the Ni-based precursor of  $\text{Ni}_3\text{N}$ /CMFs/ $\text{Ni}_3\text{N}$  ( $\text{Ni}_3\text{N}$ -CNTs,  $\text{Ni}_3\text{N}$ -Gr or  $\text{Ni}_3\text{N}$ -MPCs) was summarized in **Scheme 1**. In details, 120 mg of the carbon matrix of CMFs (CNTs, GO or MPCs), 2 mM nickel acetate and 4 mM HMT were dissolved in 40 mL of distilled water under vigorous stirring for 2 h to form the uniform mixture slurries. Then, the as-prepared mixture slurries were thoroughly transferred into the 60 mL Teflon-lined autoclaves and heated at 120 °C for another 12 h. After they were cooled down to room temperature, the final product was collected after centrifuging the resultant mixture solution. Finally, the Ni-based precursor of  $\text{Ni}_3\text{N}$ /CMFs/ $\text{Ni}_3\text{N}$  ( $\text{Ni}_3\text{N}$ -CNTs,  $\text{Ni}_3\text{N}$ -Gr, or  $\text{Ni}_3\text{N}$ -MPCs) was obtained after the product was washed (with water and ethanol) for several times and dried in a vacuum overnight.

The precursor of bulk  $\text{Ni}_3\text{N}$  was synthesized by the procedure being similar to that of the  $\text{Ni}_3\text{N}$ /CMFs/ $\text{Ni}_3\text{N}$ . The only difference is that no carbon matrix was added into the mixture slurries before they were kept in the 60 mL Teflon-lined autoclaves.

### 1.4. Synthesis of the hybrid materials of $\text{Ni}_3\text{N}$ -CNTs, $\text{Ni}_3\text{N}$ -Gr, $\text{Ni}_3\text{N}$ -MPCs, $\text{Ni}_3\text{N}$ /CMFs/ $\text{Ni}_3\text{N}$ , bulk $\text{Ni}_3\text{N}$ and NiO-CMFs

To synthesize the hybrid material of  $\text{Ni}_3\text{N}$ /CMFs/ $\text{Ni}_3\text{N}$  ( $\text{Ni}_3\text{N}$ -CNTs,  $\text{Ni}_3\text{N}$ -Gr or  $\text{Ni}_3\text{N}$ -MPCs), the as-prepared Ni-based hybrid precursor of  $\text{Ni}_3\text{N}$ /CMFs/ $\text{Ni}_3\text{N}$  ( $\text{Ni}_3\text{N}$ -CNTs,  $\text{Ni}_3\text{N}$ -Gr or  $\text{Ni}_3\text{N}$ -MPCs) was placed in porcelain boats in the tube furnace and then heated to 400 °C with a heating rate of 5 °C  $\text{min}^{-1}$  under the  $\text{NH}_3$  atmosphere. After keeping the temperature of 400 °C for 2 h, the system was naturally cooled down to room temperature under the  $\text{NH}_3$  atmosphere. The black product of  $\text{Ni}_3\text{N}$ /CMFs/ $\text{Ni}_3\text{N}$  ( $\text{Ni}_3\text{N}$ -CNTs,  $\text{Ni}_3\text{N}$ -Gr or  $\text{Ni}_3\text{N}$ -MPCs) was collected for further characterization and test.

To get the NiO/CMFs/NiO hybrid composite, the precursor of  $\text{Ni}_3\text{N}$ /CMFs/ $\text{Ni}_3\text{N}$  was placed in the tube furnace and then heated to 400 °C at a rate of 5 °C  $\text{min}^{-1}$  under the air atmosphere. After

keeping the temperature of 400 °C for 2 h, the system was naturally cooled down to room temperature under the air atmosphere. Then the as-prepared product of NiO/CMFs/NiO was collected for further characterization and test.

To synthesize the bulk Ni<sub>3</sub>N, the precursor of bulk Ni<sub>3</sub>N was also placed in porcelain boats in the tube furnace and then heated to 400 °C with a heating rate of 5 °C min<sup>-1</sup> under the NH<sub>3</sub> atmosphere.

Finally, in order to study the influence of nitridation temperatures on the OER/HER catalysis performances of different Ni<sub>3</sub>N/CMFs/Ni<sub>3</sub>N-*T* (*T* values indicate the pyrolysis temperatures) samples. The as-prepared Ni-based hybrid precursors of Ni<sub>3</sub>N/CMFs/Ni<sub>3</sub>N was calcined at *T*=350, 400, 450, 500, and 550 °C with a heating rate of 5 °C min<sup>-1</sup> under the NH<sub>3</sub> atmosphere. For all samples appeared in this paper, without special illustration, all samples were heated at 400 °C.

### 1.5. Physical characterization of resultant catalysts.

Wide-angle XRD patterns were obtained on an X-ray D/max-2200 vpc (Rigaku Corporation, Japan) instrument operated at 40 kV and 20 mA using Cu K $\alpha$  radiation ( $k$  0.15406 nm). SEM images were performed using a Philips XL-30 ESEM equipped with an EDX analyzer. TEM analysis was performed on a high-resolution Hitachi JEM-2100 system. Surface chemical analyses of resultant catalysts were carried out by XPS on an ESCA LAB spectrometer (USA) using a monochromatic Al K $\alpha$  source ( $h\nu$  1486.6 eV). The binding energies were calibrated by using the containment carbon (C1s 284.6 eV). The N<sub>2</sub> adsorption-desorption isotherms were performed on an ASAP 2020 (Micromeritics, USA). Before the measurements, the samples were degassed in vacuum at 150 °C for 6 h. The Brunauer-Emmett-Teller (BET) method was utilized to calculate the BET specific surface area using adsorption data. The pore size distribution was derived from the adsorption branch by using the Barrett-Joyner-Halenda (BJH) model. Raman spectra were obtained using a confocal microprobe Raman system (HR800, JobinYvon).

### 1.6. Electrochemical characterization methods

All electrochemical measurements for OER and HER were performed with a standard three-electrode cell at room temperature by using a rotating disk electrode (RDE) modified by catalysts as the working electrode (5 mm in diameter, 0.19625 cm<sup>2</sup>). Ag/AgCl was used as reference electrodes and Pt wire was used as counter electrode for OER test. All potentials appeared in this paper are referred to reversible hydrogen electrode (the potentials recorded and referred to reversible hydrogen electrode in each experiment were calculated using the formula  $E_{\text{RHE}} = E_{\text{Ag/AgCl}} + 0.059\text{pH} + 0.197$  V, where  $E_{\text{RHE}}$  is a potential vs. reversible hydrogen electrode (vs. RHE),  $E_{\text{Ag/AgCl}}$  is a potential vs. Ag/AgCl electrode, and pH is the pH value of electrolyte. All current densities are the ratios of recorded currents to the geometric area of electrode. The onset potentials ( $E_{\text{onset}}$ ) were determined from the intersection of the tangents of OER current and the polarization curve baseline. The resistance of the electrolytes was measured and the linear sweep voltammograms (LSVs) were recorded with *iR* drop compensation unless specifically mentioned.

In order to prepare the working electrodes, 3 mg of catalyst powders were firstly dispersed in 1 mL Nafion solution (0.5 wt%) with 45 min of ultrasonication to generate homogeneous inks. Next, 30  $\mu$ L of the dispersion was transferred onto the GCE with the catalyst loading amount of 0.306 mg cm<sup>-2</sup>. Finally, the as-prepared catalyst film was dried at room temperature.

In the electrochemical testing processes for the OER and HER; the polarization curves were plotted as potential ( $E / V$  vs. RHE) vs.  $\log |j / \text{mA cm}^{-2}|$  to get the Tafel plots for assessing the OER kinetics of resultant catalysts. By fitting the linear portion of the Tafel plots to the Tafel equation ( $\eta = b \log(j) + a$ ), the Tafel slope ( $b$  values) can be obtained.

For the full water splitting tests, a standard two-electrode cell was adopted. The  $\text{Ni}_3\text{N}/\text{CMFs}/\text{Ni}_3\text{N}$  hybrid samples are used as both negative and positive electrodes to construct the (-)  $\text{Ni}_3\text{N}/\text{CMFs}/\text{Ni}_3\text{N}||\text{Ni}_3\text{N}/\text{CMFs}/\text{Ni}_3\text{N}$  (+) electrolysis system; for comparison, existing most efficient catalytic benchmark of (-)  $\text{Pt}||\text{RuO}_2$  (+) was also tested for water splitting reaction.

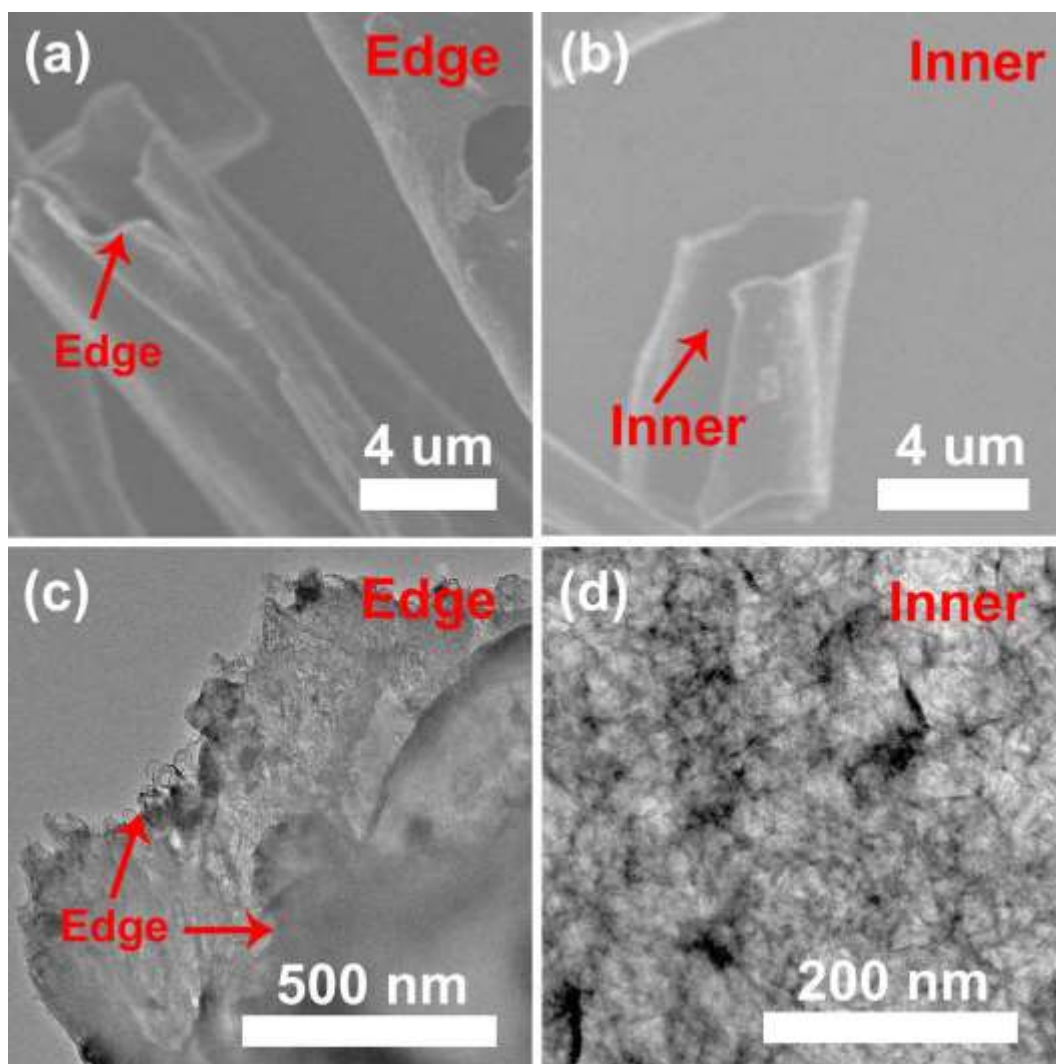

**Figure S1** (a and b) SEM images of an individual CMFs. (c) TEM image of the edge part on the outer surface of an individual CMFs. (d) TEM image of the inner surface of an individual CMFs.

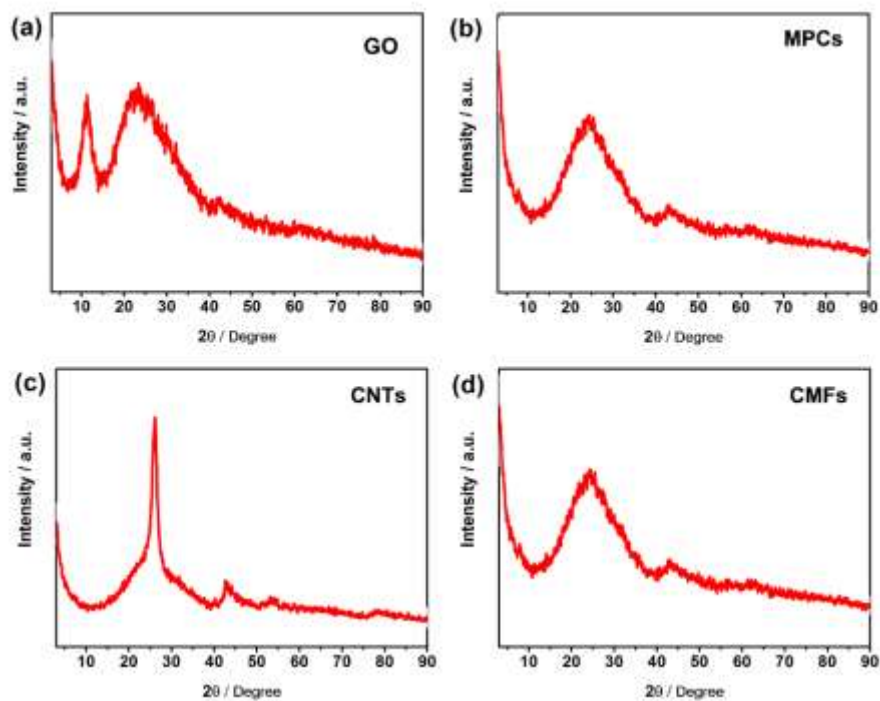

**Figure S2** XRD patterns of (a) GO, (b) MPCs, (c) CNTs, and (d) CMFs matrices.

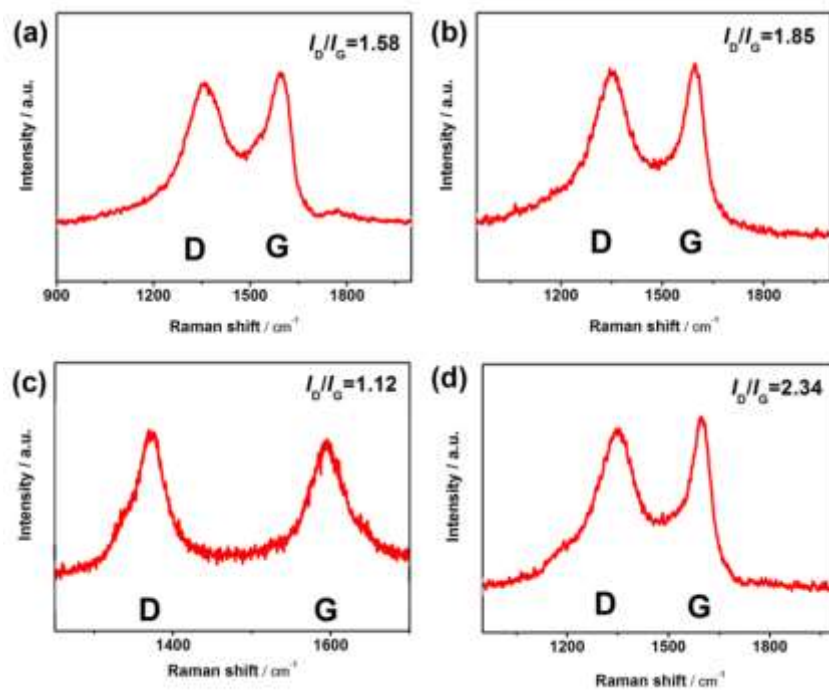

**Figure S3** Raman spectra of (a) GO, (b) MPCs, (c) CNTs, and (d) CMFs matrices.

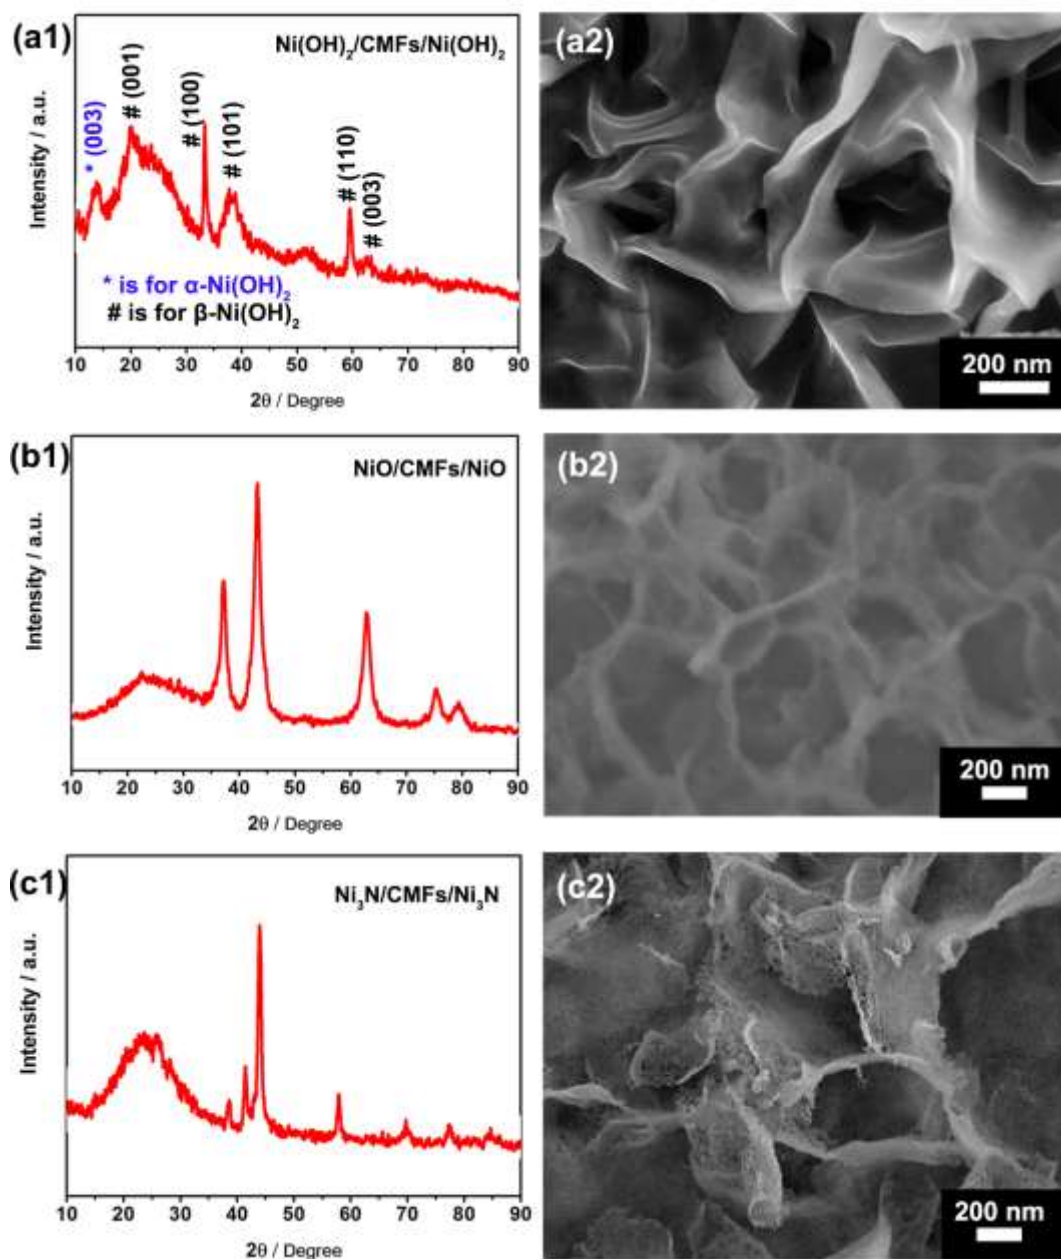

**Figure S4** XRD patterns (a1, b1 and c1) and SEM images (a2, b2 and c2) of  $\text{Ni(OH)}_2/\text{CMFs}/\text{Ni(OH)}_2$  (a1 and a2),  $\text{NiO}/\text{CMFs}/\text{NiO}$  (b1 and b2) and  $\text{Ni}_3\text{N}/\text{CMFs}/\text{Ni}_3\text{N}$  (c1 and c2). For  $\text{NiO}/\text{CMFs}/\text{NiO}$ , only five characteristic peaks of NiO phase (JCPDS, No. 14-0117) can be seen in its XRD pattern (b1).

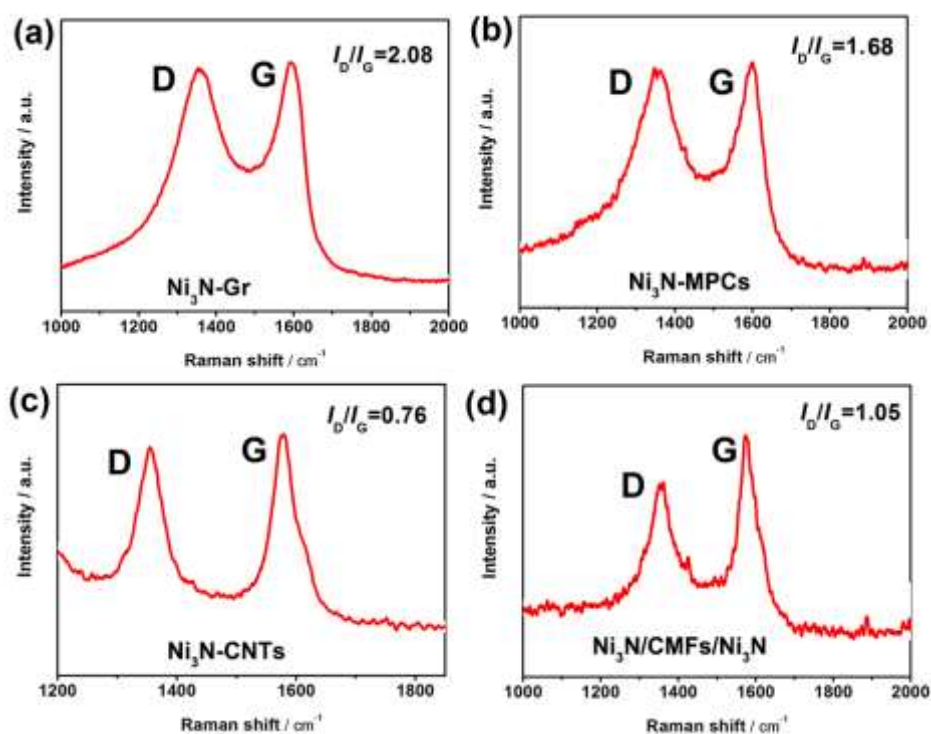

**Figure S5** Raman spectra of the resultant Ni<sub>3</sub>N-Gr (a), Ni<sub>3</sub>N-MPCs (b), Ni<sub>3</sub>N-CNTs (c), and Ni<sub>3</sub>N/CMFs/Ni<sub>3</sub>N (d) hybrid nanomaterials.

**Table S1.** The comparison of textural properties and Raman analysis results for bulk Ni<sub>3</sub>N, Ni<sub>3</sub>N-Gr, Ni<sub>3</sub>N-MPCs, Ni<sub>3</sub>N-CNTs and Ni<sub>3</sub>N/CMFs/Ni<sub>3</sub>N hybrid materials.

| Samples                                  | $S_{\text{BET}}$<br>( $\text{m}^2 \text{g}^{-1}$ ) | Pore Volume<br>( $\text{m}^3 \text{g}^{-1}$ ) | Average pore width<br>(nm) | $I_{\text{D}}/I_{\text{G}}$ |
|------------------------------------------|----------------------------------------------------|-----------------------------------------------|----------------------------|-----------------------------|
| Bulk Ni <sub>3</sub> N                   | 2.79                                               | 0.03                                          | -                          | -                           |
| Ni <sub>3</sub> N-Gr                     | 152.45                                             | 0.16                                          | 6.21                       | 2.08                        |
| Ni <sub>3</sub> N-MPCs                   | 94.39                                              | 0.14                                          | 9.36                       | 1.68                        |
| Ni <sub>3</sub> N-CNTs                   | 67.70                                              | 0.21                                          | 17.54                      | 0.76                        |
| Ni <sub>3</sub> N/CMFs/Ni <sub>3</sub> N | 126.53                                             | 0.40                                          | 20.86                      | 1.05                        |

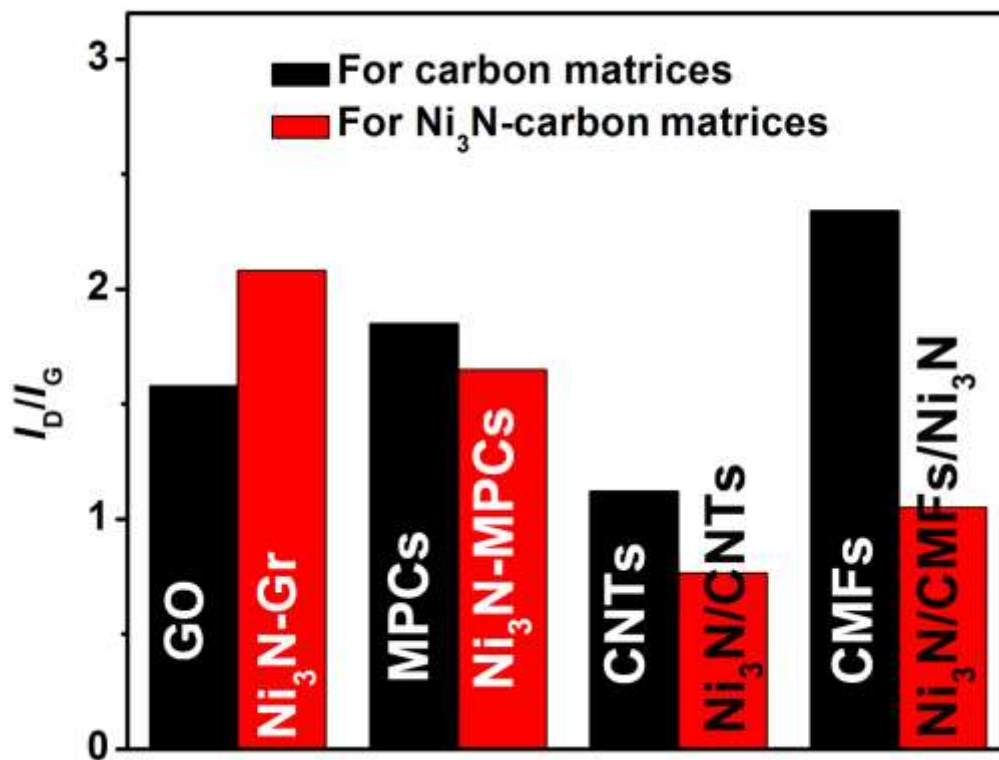

**Figure S6** The  $I_D/I_G$  values diagram which was obtained from the Raman spectra in **Figures S5** and **S3**.

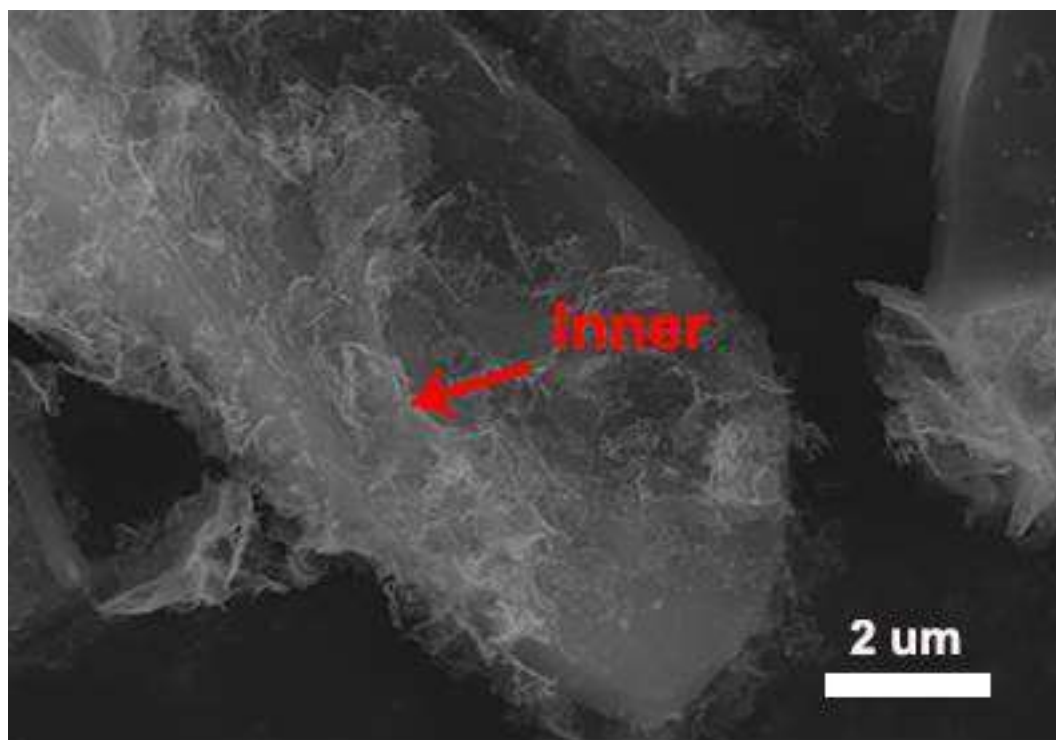

**Figure S7** SEM image of the inner wall of as-prepared Ni<sub>3</sub>N/CMFs/Ni<sub>3</sub>N sample.



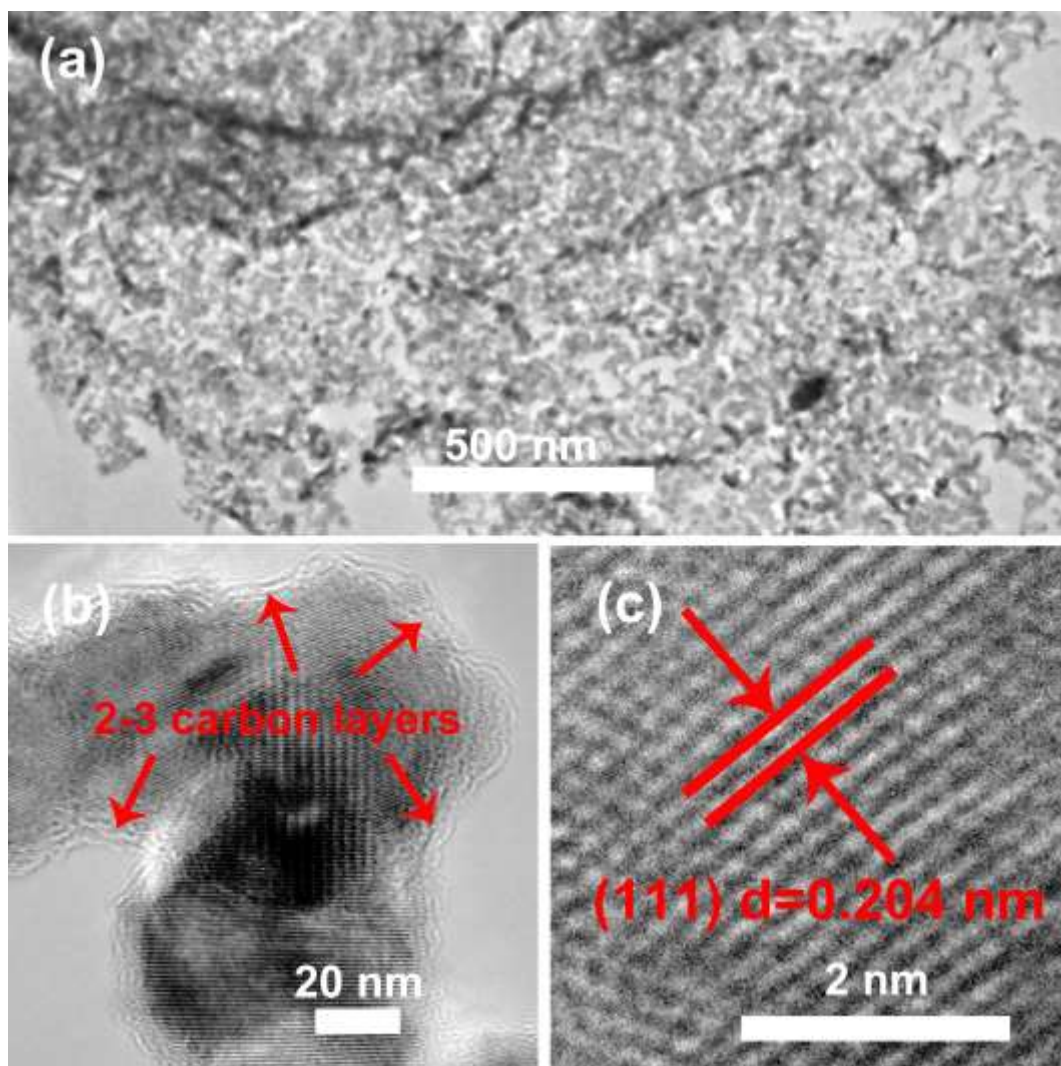

**Figure S8** (a) TEM image of an individual Ni<sub>3</sub>N NSs located on outer surface of Ni<sub>3</sub>N/CMFs/Ni<sub>3</sub>N. (b-c) TEM images of the Ni<sub>3</sub>N NPs embed in the Ni<sub>3</sub>N NSs. As shown, each Ni<sub>3</sub>N NPs core showing the polycrystalline structure was surrounded by several carbon shells.

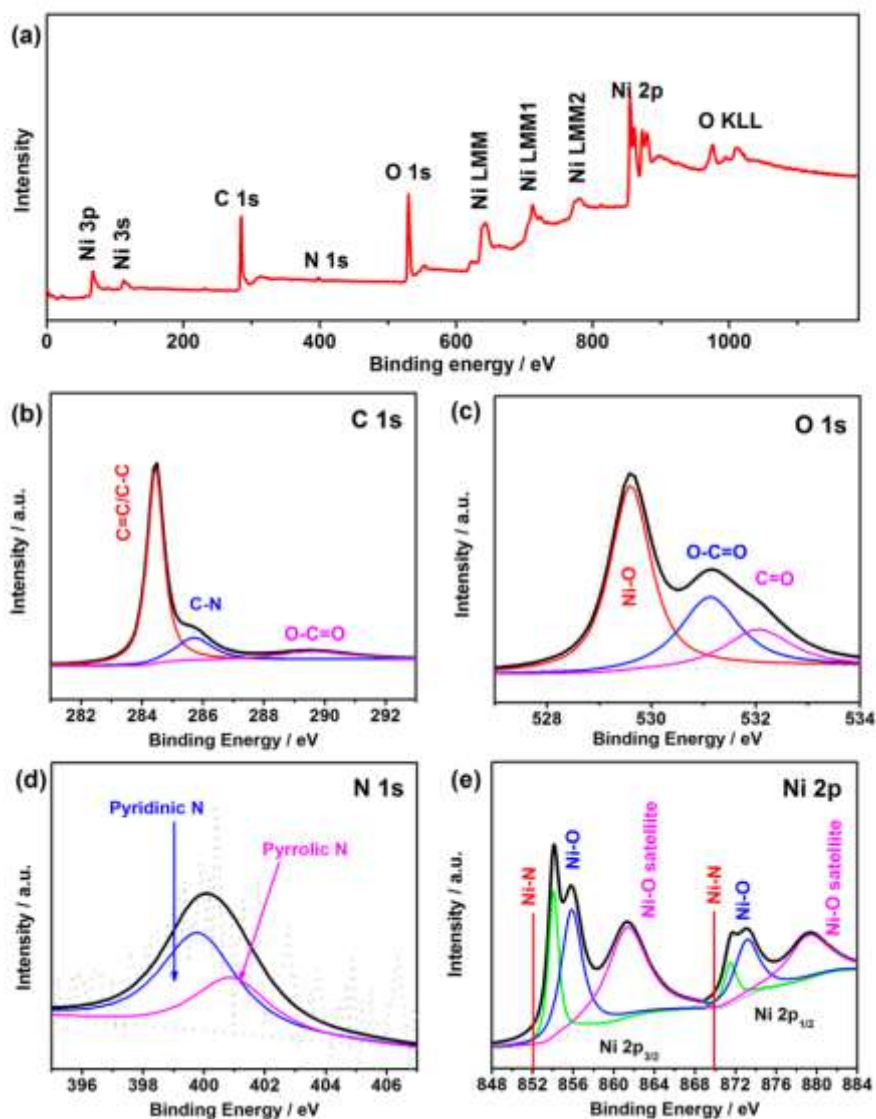

**Figure S9** XPS survey spectra (a) and high-resolution XPS spectra of C 1s (b), O 1s (c), N 1s (d), and Ni 2p (e) for the NiO/CMFs/NiO hybrid sample.

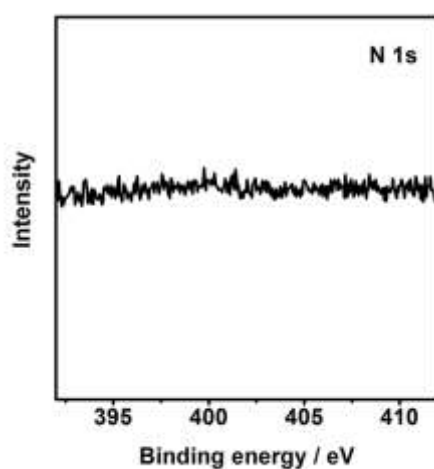

**Figure S10** The high-resolution N 1s XPS spectrum of CMFs matrices after being calcined at 400 °C under  $\text{NH}_3$  atmosphere for 2 h.

To verify the OER catalytic efficiency of metallic Ni<sub>3</sub>N NSs itself, electrochemical measurements were performed for Ni(OH)<sub>2</sub>/CMFs/Ni(OH)<sub>2</sub> and NiO/CMFs/NiO in 1.0 M KOH (**Figure S11**). As shown in **Figure S11a**, the Ni(II)-to-Ni(III) oxidation potential for Ni<sub>3</sub>N/CMFs/Ni<sub>3</sub>N is much more negative than that for either Ni(OH)<sub>2</sub>/CMFs/Ni(OH)<sub>2</sub> or NiO/CMFs/NiO, demonstrating the Ni atoms in Ni<sub>3</sub>N/CMFs/Ni<sub>3</sub>N were much easier to be oxidized to NiOOH with higher valence state compare to Ni(OH)<sub>2</sub>/CMFs/Ni(OH)<sub>2</sub> or NiO/CMFs/NiO. The OER performance derived from LSV curves for Ni<sub>3</sub>N/CMFs/Ni<sub>3</sub>N ( $E_{\text{onset}}$  of 1.435 V vs. RHE,  $E_{10}$  of 1.503 V vs. RHE, Tafel slope of 41.54 mV dec<sup>-1</sup>) was better than those of Ni(OH)<sub>2</sub>/CMFs/Ni(OH)<sub>2</sub> (1.638 V vs. RHE, 1.716 V vs. RHE, 58.96 mV dec<sup>-1</sup>) and NiO/CMFs/NiO (1.658 V vs. RHE, 1.732 V vs. RHE, 65.34 mV dec<sup>-1</sup>) (**Figures S11b-e**).

On the other hand, the porous structure of the Ni<sub>3</sub>N NSs on Ni<sub>3</sub>N/CMFs/Ni<sub>3</sub>N was able to promote the charge-transfer rate compared with either NiO NSs or Ni(OH)<sub>2</sub> NSs with the relatively smooth surface. For this, EIS spectra (**Figure S11f**) of three samples have provided the robust evidence with Ni<sub>3</sub>N/CMFs/Ni<sub>3</sub>N own the minimum  $R_{\text{ct}}$  value *versus* the other two reference samples. For the three control samples, as the hollow tube-type structures are shared characteristics, the better catalytic ability of Ni<sub>3</sub>N/CMFs/Ni<sub>3</sub>N is mainly because of the enhanced metallic electrical conductivity behavior of Ni<sub>3</sub>N phase, more exposed active sites of mesoporous Ni<sub>3</sub>N NSs, and the higher charge-transfer rate of ultra-thin 2D mesoporous Ni<sub>3</sub>N NSs suffering from the etching of NH<sub>3</sub> (**Figure S4c2**).

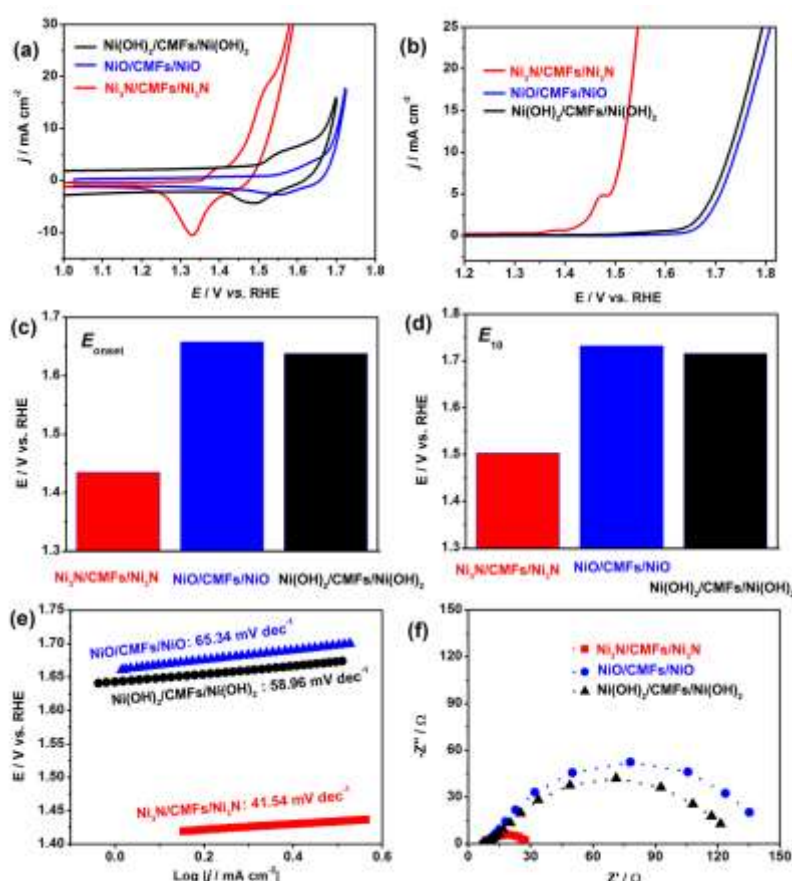

**Figure S11** (a) CV curves recorded at 50 mV s<sup>-1</sup> in 1.0 M KOH, (b) IR-corrected LSV polarization curves for OER collected at 5 mV s<sup>-1</sup> in O<sub>2</sub>-saturated 1.0 M KOH, and the histograms of OER  $E_{\text{onset}}$  (c) and  $E_{10}$  (got at a current density of 10 mA cm<sup>-2</sup>) values (d) for Ni<sub>3</sub>N/CMFs/Ni<sub>3</sub>N, Ni(OH)<sub>2</sub>/CMFs/Ni(OH)<sub>2</sub>, and NiO/CMFs/NiO. (e) Tafel plots derived from OER LSVs shown in Figure S11b and (f) EIS spectra measured at 1.60 V vs. RHE for Ni<sub>3</sub>N/CMFs/Ni<sub>3</sub>N and 1.80 V vs. RHE for Ni(OH)<sub>2</sub>/CMFs/Ni(OH)<sub>2</sub> and NiO/CMFs/NiO.

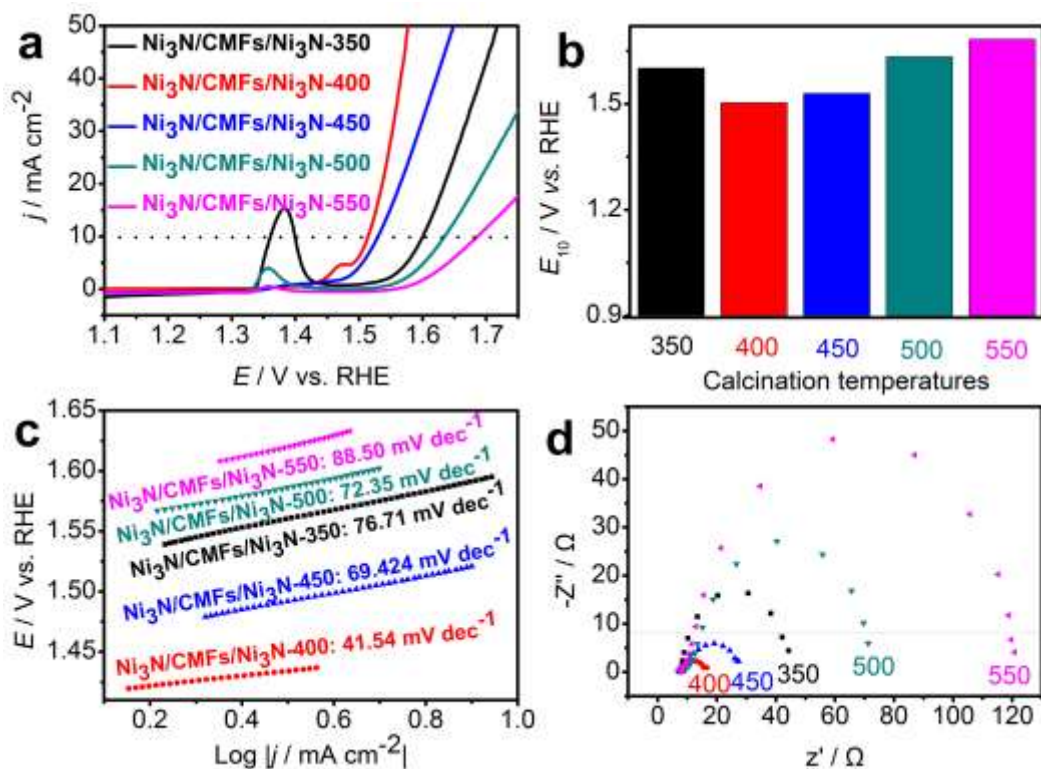

**Figure S12** (a) IR-corrected LSV polarization curves for OER collected at 5 mV s<sup>-1</sup>. (b) The histograms of OER  $E_{10}$  values. (c) Tafel plots derived from OER LSVs in Figure S12a. (d) EIS spectra measured at 1.60 V vs. RHE for  $\text{Ni}_3\text{N}/\text{CMFs}/\text{Ni}_3\text{N}-T$  samples calcined at 350, 400, 450, 500, and 550 °C.

To verify the OER catalytic efficiencies of  $\text{Ni}_3\text{N}/\text{CMFs}/\text{Ni}_3\text{N}-T$  samples calcined at 350, 400, 450, 500, and 550 °C, respectively. Electrochemical measurements were performed for  $\text{Ni}_3\text{N}/\text{CMFs}/\text{Ni}_3\text{N}-T$  ( $T=350, 400, 450, 500, \text{ and } 550$  °C) samples in 1.0 M KOH (**Figure S12**). As shown in **Figures S12a-c**, the  $E_{10}$  value (1.503 V vs. RHE) and Tafel slope (41.54 mV dec<sup>-1</sup>) of  $\text{Ni}_3\text{N}/\text{CMFs}/\text{Ni}_3\text{N}-400$  toward OER are much smaller than those of  $\text{Ni}_3\text{N}/\text{CMFs}/\text{Ni}_3\text{N}-350$  ( $E_{10}=1.601$  V vs. RHE, Tafel slope=76.71 mV dec<sup>-1</sup>),  $\text{Ni}_3\text{N}/\text{CMFs}/\text{Ni}_3\text{N}-450$  ( $E_{10}=1.529$  V vs. RHE, Tafel slope=69.42 mV dec<sup>-1</sup>),  $\text{Ni}_3\text{N}/\text{CMFs}/\text{Ni}_3\text{N}-500$  ( $E_{10}=1.633$  V vs. RHE, Tafel slope=72.35 mV dec<sup>-1</sup>), and  $\text{Ni}_3\text{N}/\text{CMFs}/\text{Ni}_3\text{N}-550$  ( $E_{10}=1.683$  V vs. RHE, Tafel slope=88.50 mV dec<sup>-1</sup>). At the same time, the  $R_{ct}$  values at 1.60 V vs. RHE for different  $\text{Ni}_3\text{N}/\text{CMFs}/\text{Ni}_3\text{N}-T$  materials increased by the order of  $\text{Ni}_3\text{N}/\text{CMFs}/\text{Ni}_3\text{N}-400 < \text{Ni}_3\text{N}/\text{CMFs}/\text{Ni}_3\text{N}-450 < \text{Ni}_3\text{N}/\text{CMFs}/\text{Ni}_3\text{N}-350 < \text{Ni}_3\text{N}/\text{CMFs}/\text{Ni}_3\text{N}-500 < \text{Ni}_3\text{N}/\text{CMFs}/\text{Ni}_3\text{N}-550$ . This means that  $\text{Ni}_3\text{N}/\text{CMFs}/\text{Ni}_3\text{N}-400$  exhibited faster charge-transfer rate in comparison with all other  $\text{Ni}_3\text{N}/\text{CMFs}/\text{Ni}_3\text{N}-T$  materials calcined at 350, 450, 500, and 550 °C. In conclusion, 400 °C is the optimal pyrolysis temperature for synthesizing the most efficient  $\text{Ni}_3\text{N}/\text{CMFs}/\text{Ni}_3\text{N}$  catalyst toward OER.

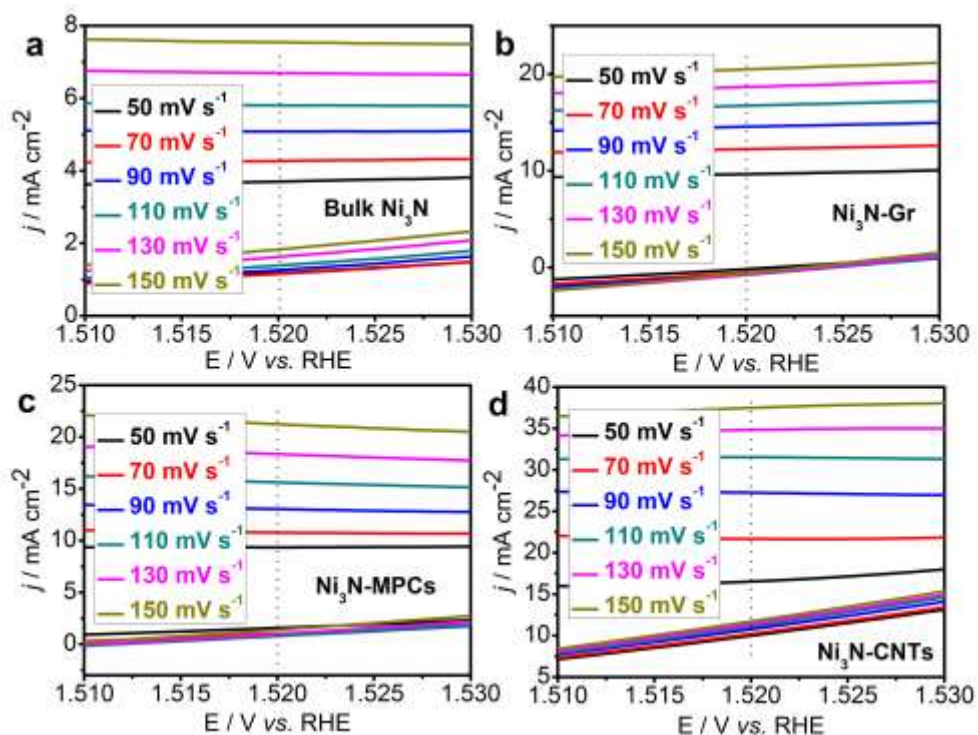

**Figure S13** CV curves recorded at different scan rates from 50 to 150  $\text{mV s}^{-1}$  between a potential range of 1.51-1.53 V vs. RHE for bulk  $\text{Ni}_3\text{N}$  (a),  $\text{Ni}_3\text{N-Gr}$  (b),  $\text{Ni}_3\text{N-MPCs}$  (c), and  $\text{Ni}_3\text{N-CNTs}$  (d) in 1.0 M KOH solution.

**Table S2** A comparison on OER catalytic parameters between our resultant catalysts and other as-reported non-precious metal based OER catalysts.

| Catalyst                                                  | $E$ at $10 \text{ mA cm}^{-2}$<br>(V vs. RHE) | Tafel slope<br>( $\text{mV dec}^{-1}$ ) | References                                    |
|-----------------------------------------------------------|-----------------------------------------------|-----------------------------------------|-----------------------------------------------|
| Bulk $\text{Ni}_3\text{N}$                                | 1.737                                         | 66.98                                   | <b>This work</b>                              |
| $\text{Ni}_3\text{N-Gr}$                                  | 1.607                                         | 58.23                                   |                                               |
| $\text{Ni}_3\text{N-MPCs}$                                | 1.594                                         | 57.36                                   |                                               |
| $\text{Ni}_3\text{N-CNTs}$                                | 1.551                                         | 50.07                                   |                                               |
| <b><math>\text{Ni}_3\text{N/CMFs/Ni}_3\text{N}</math></b> | <b>1.503</b>                                  | <b>41.54</b>                            |                                               |
| $\text{RuO}_2$                                            | 1.534                                         | 43.45                                   |                                               |
| $\text{Ni}_2\text{P}$ nanowires                           | 1.52                                          | 47                                      | Energy Environ. Sci., 2015, 8, 2347-2351      |
| $\text{NiSe/NF}$                                          | 1.50                                          | 64                                      | Angew.Chem. Int .Ed. 2015, 54,9351 –9355      |
| $\text{NiFe@NC}$                                          | 1.58                                          | 56                                      | Nano Energy 30 (2016) 426–433                 |
| $\text{TiN@Ni}_3\text{N}$                                 | 1.58                                          | 93.7                                    | J. Mater. Chem. A, 2016, 4, 5713–5718         |
| $\text{FeNi@NC}$                                          | 1.51                                          | 70                                      | Energy Environ. Sci., 2016, 9, 123-129        |
| $\text{Ni}_3\text{Se}_2\text{-GC}$                        | 1.54                                          | 79.5                                    | Energy Environ. Sci., 2016, 9, 1771-1782      |
| $\text{MWCNTs@NiCoS}$                                     | 1.59                                          | 96                                      | ACS Appl. Mater. Interfaces, 2016, 8 (1), 945 |
| $\text{Co}_4\text{N}$                                     | 1.56                                          | 58                                      | Inorg. Chem. Front., 2016, 3, 236–242         |

|                                            |       |      |                                              |
|--------------------------------------------|-------|------|----------------------------------------------|
| CoN                                        | 1.52  | 70   | Angew.Chem. Int. Ed. 2016, 55,8670–8674      |
| Co <sub>4</sub> N nanowire arrays          | 1.49  | 44   | Angew. Chem. 2015, 127, 14923–14927          |
| Co-B <sub>i</sub> NSs/G hybrids            | 1.52  | 53   | Angew.Chem. 2016, 128,2534–2538              |
| Co@Co <sub>3</sub> O <sub>4</sub> /NC      | 1.64  | 54.3 | Angew.Chem. Int.Ed. 2016, 55,4087–4091       |
| CP/CTs/Co-S                                | 1.536 | 72   | ACS Nano 2016, 10, 2342–2348                 |
| Co <sub>3</sub> O <sub>4</sub> /N-graphene | 1.54  | 67   | Nature Materials, 10 (2011) 780-786.         |
| CoP/rGO                                    | 1.57  | 66   | Chem. Sci., 2016, 7, 1690–1695               |
| N-CG-CoO                                   | 1.57  | 71   | Energy Environ. Sci., 7 (2014) 609-616       |
| CoFe/C                                     | 1.53  | 61   | Chem. Sci., 2015, 6, 3572-3576               |
| Co <sub>3</sub> O <sub>4</sub> /BDHC       | 1.59  | 47   | Adv. Funct. Mater. 2014, 24, 7655-7665       |
| CoSe <sub>2</sub> -N-Gr                    | 1.55  | 44   | J. Am. Chem. Soc. 2014, 136, 15670-15675     |
| NCNTs/Co <sub>x</sub> Mn <sub>1-x</sub> O  | 1.57  | 40   | Nano Energy (2016) 20, 315–325               |
| CoPi                                       | 1.61  | 58.7 | Small, 2016, 12, 1709-1715.                  |
| Porous MoO <sub>2</sub> needs              | 1.49  | 54   | Advanced Materials, 2016, 28(19): 3785-3790. |
| LiCoO <sub>2</sub>                         | 1.66  | 48   | EnergyEnviron.Sci., 2016, <b>9</b> , 184-192 |

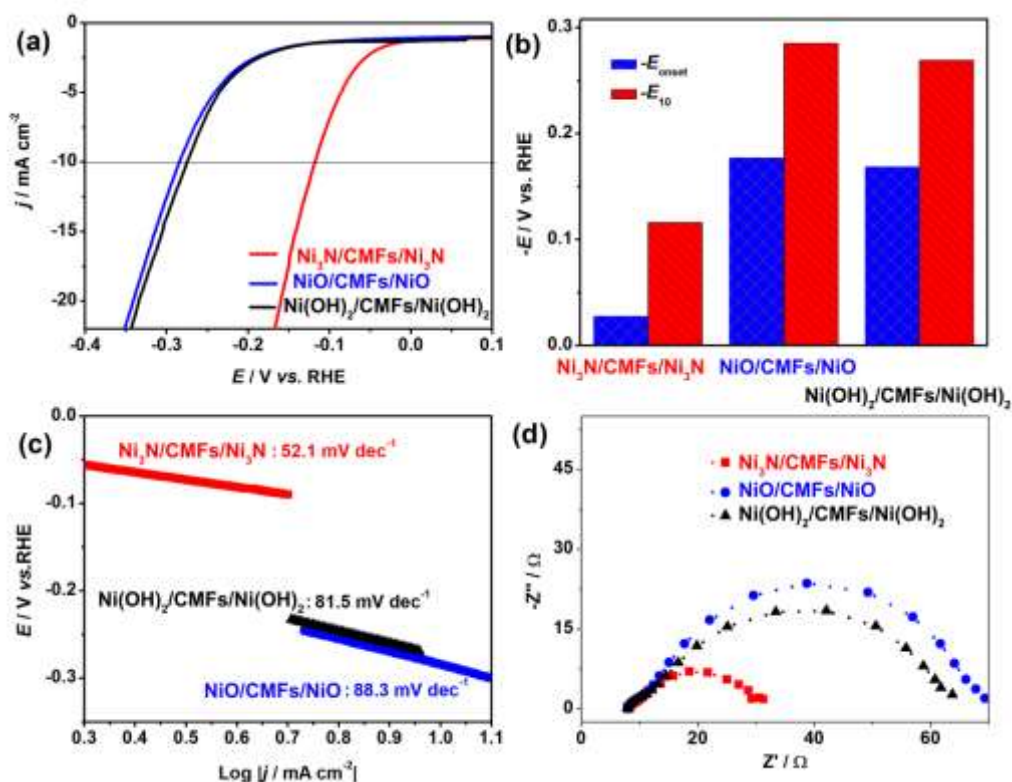

**Figure S14** (a) IR-corrected LSV polarization curves for HER at  $5 \text{ mV s}^{-1}$  in  $\text{N}_2$ -saturated  $1 \text{ M KOH}$ . (b) The histograms of HER  $E_{\text{onset}}$  and  $E_{10}$  (got at a current density of  $10 \text{ mA cm}^{-2}$ ) values, and (c) Tafel plots derived from HER LSV polarization curves shown in Figure S14a. (d) EIS spectra measured at  $-0.25 \text{ V}$  (vs. RHE) for  $\text{Ni}_3\text{N}/\text{CMFs}/\text{Ni}_3\text{N}$ ,  $\text{Ni}(\text{OH})_2/\text{CMFs}/\text{Ni}(\text{OH})_2$ , and  $\text{NiO}/\text{CMFs}/\text{NiO}$  in  $\text{N}_2$ -saturated  $1 \text{ M KOH}$ .

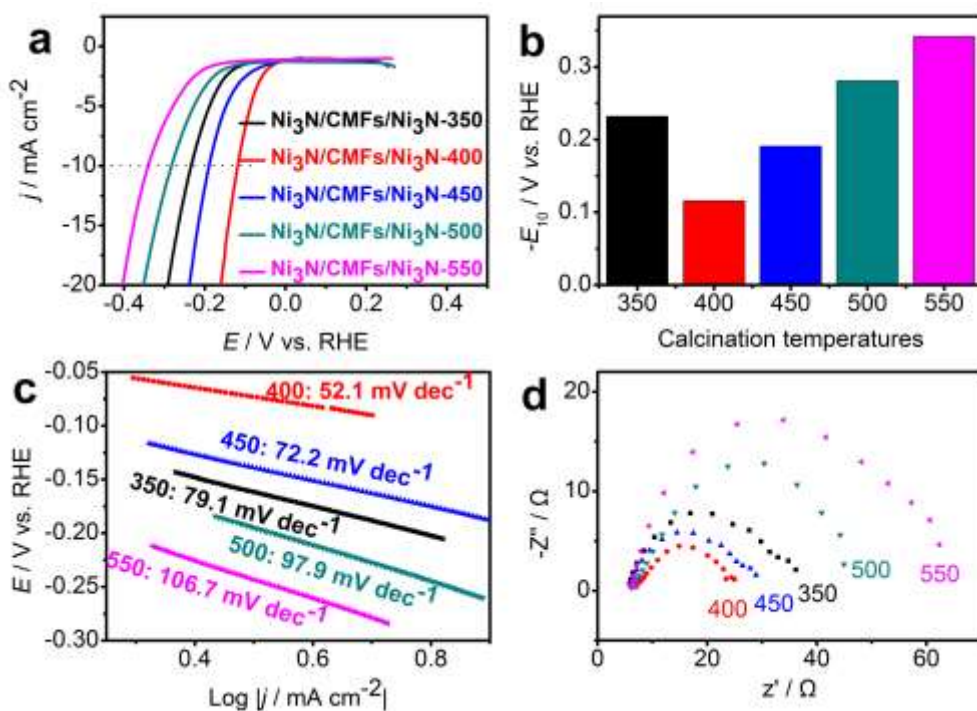

**Figure S15** (a) IR-corrected LSV polarization curves for HER collected at  $5 \text{ mV s}^{-1}$ . (b) The histograms of HER  $E_{10}$  values. (c) Tafel plots derived from HER LSVs in Figure S15a. (d) EIS spectra measured at  $-0.25 \text{ V vs. RHE}$  for  $\text{Ni}_3\text{N/CMFs/Ni}_3\text{N}$  calcined at 350, 400, 450, 500, and 550  $^{\circ}\text{C}$ .

To verify the HER catalytic efficiencies of  $\text{Ni}_3\text{N/CMFs/Ni}_3\text{N-}T$  samples calcined at 350, 400, 450, 500, and 550  $^{\circ}\text{C}$ , electrochemical measurements were performed for  $\text{Ni}_3\text{N/CMFs/Ni}_3\text{N-}T$  ( $T=350, 400, 450, 500, \text{ and } 550 \text{ }^{\circ}\text{C}$ ) samples in 1.0 M KOH (**Figure S15**). As shown in **Figures S15a-c**, the overpotential at  $10 \text{ mA cm}^{-2}$  ( $\eta_{10}$ : 0.115 V) and Tafel slope ( $52.1 \text{ mV dec}^{-1}$ ) of  $\text{Ni}_3\text{N/CMFs/Ni}_3\text{N-}400$  toward HER are much smaller than those of  $\text{Ni}_3\text{N/CMFs/Ni}_3\text{N-}350$  ( $\eta_{10}$  of 0.232 V, Tafel slope of  $79.1 \text{ mV dec}^{-1}$ ),  $\text{Ni}_3\text{N/CMFs/Ni}_3\text{N-}450$  ( $\eta_{10}$  of 0.191 V, Tafel slope of  $72.2 \text{ mV dec}^{-1}$ ),  $\text{Ni}_3\text{N/CMFs/Ni}_3\text{N-}500$  ( $\eta_{10}$  of 0.281 V, Tafel slope of  $97.9 \text{ mV dec}^{-1}$ ), and  $\text{Ni}_3\text{N/CMFs/Ni}_3\text{N-}550$  ( $\eta_{10}$  of 0.342 V, Tafel slope of  $106.7 \text{ mV dec}^{-1}$ ). At the same time, the  $R_{ct}$  values at  $-0.25 \text{ V vs. RHE}$  for different  $\text{Ni}_3\text{N/CMFs/Ni}_3\text{N-}T$  materials increase by the order of  $\text{Ni}_3\text{N/CMFs/Ni}_3\text{N-}400 < \text{Ni}_3\text{N/CMFs/Ni}_3\text{N-}450 < \text{Ni}_3\text{N/CMFs/Ni}_3\text{N-}350 < \text{Ni}_3\text{N/CMFs/Ni}_3\text{N-}500 < \text{Ni}_3\text{N/CMFs/Ni}_3\text{N-}550$ , which proves that  $\text{Ni}_3\text{N/CMFs/Ni}_3\text{N-}400$  exhibited faster charge-transfer rates in comparison with all other  $\text{Ni}_3\text{N/CMFs/Ni}_3\text{N-}T$  materials calcined at 350, 450, 500, and 550  $^{\circ}\text{C}$ . In conclusion, 400  $^{\circ}\text{C}$  is the optimal pyrolysis temperature for synthesizing the most efficient  $\text{Ni}_3\text{N/CMFs/Ni}_3\text{N}$  catalyst toward HER.

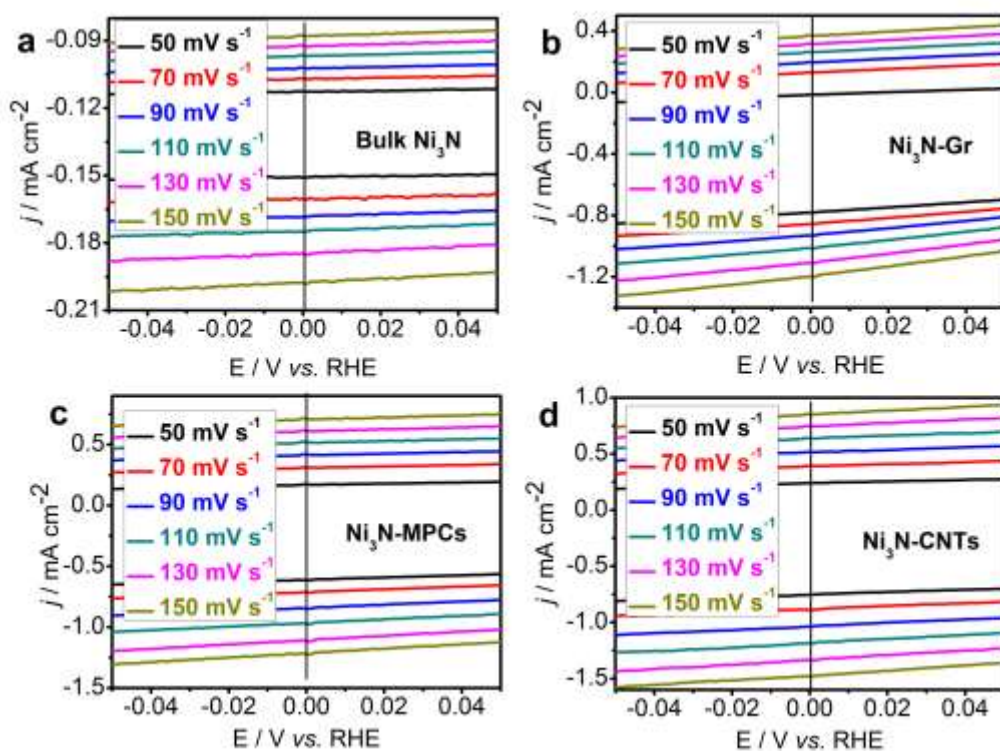

**Figure S16** CV curves recorded at different scan rates from 50 to 150  $\text{mV s}^{-1}$  between a potential range of -0.05-0.05 V vs. RHE for bulk  $\text{Ni}_3\text{N}$  (a),  $\text{Ni}_3\text{N-Gr}$  (b),  $\text{Ni}_3\text{N-MPCs}$  (c), and  $\text{Ni}_3\text{N-CNTs}$  (d) in 1 M KOH solution.

**Table S3** Comparison of HER activity for those resultant catalysts and other reported non-precious metal based HER catalysts in 1 M KOH.

| Catalysts                                                 | $E_{10}$<br>(V vs. RHE) | Tafel slopes<br>( $\text{mV dec}^{-1}$ ) | References                                          |
|-----------------------------------------------------------|-------------------------|------------------------------------------|-----------------------------------------------------|
| Bulk $\text{Ni}_3\text{N}$                                | -0.349                  | 109.2                                    | <b>This work</b>                                    |
| $\text{Ni}_3\text{N-Gr}$                                  | -0.201                  | 89.9                                     |                                                     |
| $\text{Ni}_3\text{N-MPCs}$                                | -0.175                  | 74.9                                     |                                                     |
| $\text{Ni}_3\text{N-CNTs}$                                | -0.149                  | 62.5                                     |                                                     |
| <b><math>\text{Ni}_3\text{N/CMFs/Ni}_3\text{N}</math></b> | <b>-0.115</b>           | <b>52.1</b>                              |                                                     |
| <b>Pt/C</b>                                               | <b>-0.075</b>           | <b>34.9</b>                              |                                                     |
| Ni-NiO/N-rGO                                              | -0.26                   | 67                                       | Adv. Funct. Mater. 2015, 25, 5799–5808              |
| $\text{Ni}_2\text{P}$ Nanosheets                          | -0.078                  | 142                                      | ACS Appl. Mater. Interfaces, 2015, 7 (4), 2376-2384 |
| $\text{Ni}_2\text{P}$                                     | -0.25                   | 100                                      | J Am Chem Soc 2013, 135(51): 19186-19192            |
| $\text{Ni}_3\text{P}_4$                                   | -0.15                   | 53                                       | Angew.Chem.Int. Ed. 2015, 127,12538-12542           |
| NiSe/NF                                                   | -0.096                  | 120                                      | Angew.Chem.Int. Ed. 2015, 54,9351-9355              |
| $\text{NiFeO}_x/\text{CFP}$                               | -0.088                  | 84.6                                     | Nature Communications 2015, 6, 7261                 |
| EG/ $\text{Co}_{0.85}\text{Se/NiFe-LDH}$                  | -0.26                   | 160                                      | Energy Environ. Sci., 2016, <b>9</b> , 478-483      |
| Ni- $\text{B}_x$ film                                     | -0.135                  | 88                                       | Nano Energy (2016) 19, 98-107                       |
| $\text{Co}_{0.6}\text{Mo}_{1.4}\text{N}_2$                | -0.32                   | 80                                       | Nat Mater 2012, 11(6): 550-557                      |
| Co@CNF                                                    | -0.196                  | 96                                       | Nano Energy 23 (2016) 105–113                       |



|                                                      |        |       |                                          |
|------------------------------------------------------|--------|-------|------------------------------------------|
| Zn <sub>0.30</sub> Co <sub>2.70</sub> S <sub>4</sub> | -0.085 | 47.5- | J. Am. Chem. Soc. 2016, 138, 1359–1365   |
| ONPPGC/OCC                                           | -0.446 | 154   | Energy Environ. Sci., 2016, 9, 1210-1214 |
| CoP/rGO-400                                          | -0.15  | 38    | Chem. Sci., 2016, 7, 1690-1695           |
| Ni-Mo-N                                              | -0.043 | 40    | Nano Energy (2016) 22, 111–119           |
| CoS <sub>2</sub> MW                                  | -0.158 | 58    | J. Am. Chem. Soc. 2014, 136, 10053–10061 |
| MoS <sub>2+x</sub> -CE                               | -0.31  | 84    | Angew. Chem. Int. Ed. 2015, 54, 664–667  |
| CP/CTs/Co-S                                          | -0.19  | 131   | ACS Nano 2016, 10, 2342–2348             |
| CoPS NPI                                             | -0.048 | 56    |                                          |
| P-1T-MoS <sub>2</sub>                                | -0.153 | 43    | J. Am. Chem. Soc. 2016, 138, 7965–7972   |

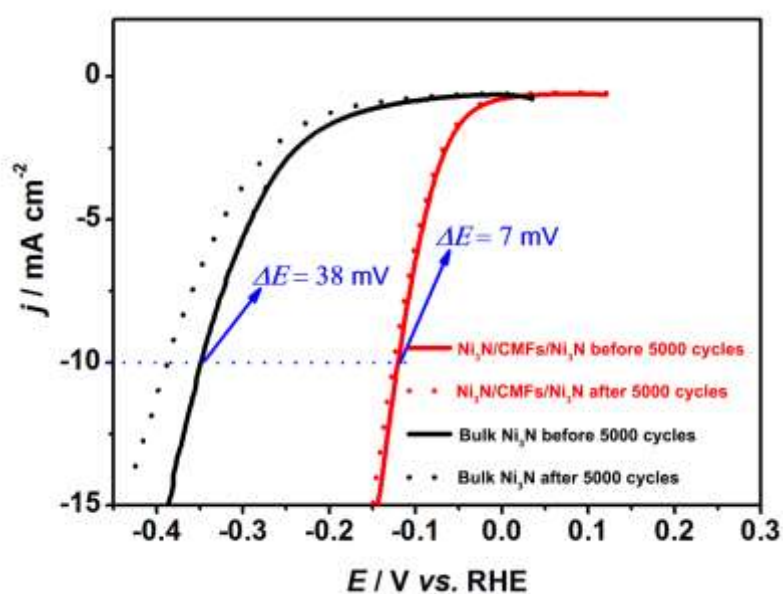

**Figure S17** HER stability tests for the bulk Ni<sub>3</sub>N and Ni<sub>3</sub>N/CMFs/Ni<sub>3</sub>N, by comparing their LSV polarization curves before and after 5000 CV cycles [cycling between -0.35 and 0.10 V (vs. RHE)].

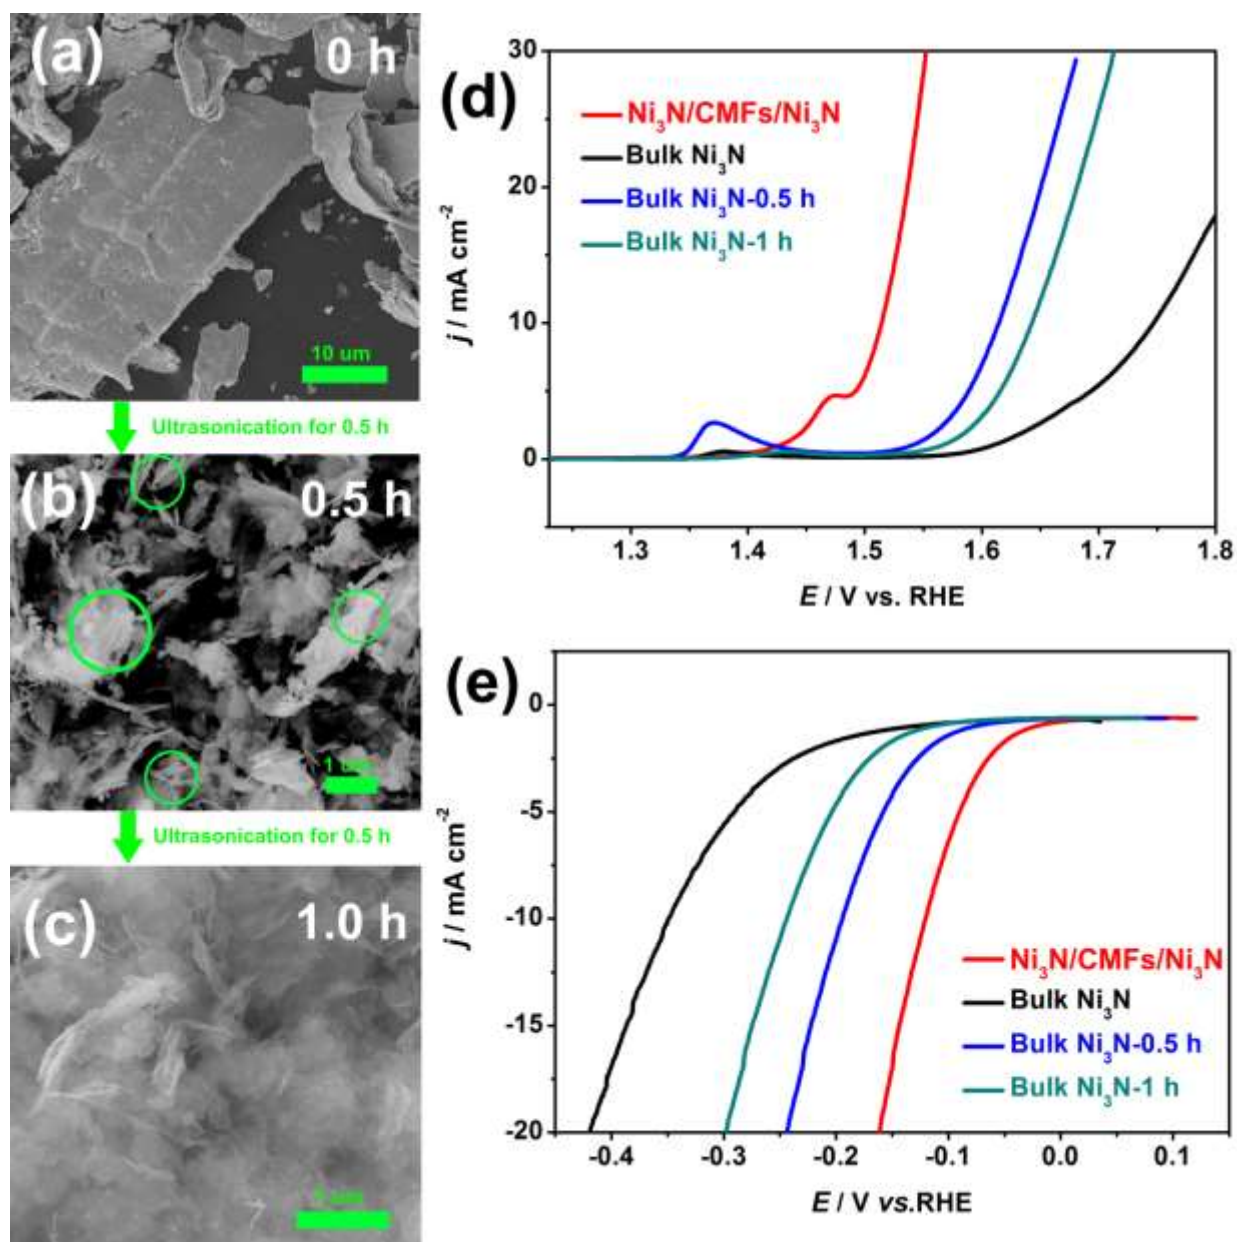

**Figure S18** SEM images of (a) the initial bulk  $\text{Ni}_3\text{N}$ , (b) the bulk  $\text{Ni}_3\text{N}$  after the ultrasonication treatment for 0.5 h (denoted as  $\text{Ni}_3\text{N}$ -0.5), and (c) the bulk  $\text{Ni}_3\text{N}$  after the ultrasonication treatment for 1 h (denoted as  $\text{Ni}_3\text{N}$ -1). (d) *IR*-corrected LSV polarization curves for OER in  $\text{O}_2$ -saturated 1.0 M KOH at  $5 \text{ mV s}^{-1}$  and (e) *IR*-corrected LSV polarization curves for HER in  $\text{N}_2$ -saturated 1 M KOH at  $5 \text{ mV s}^{-1}$  for the bulk  $\text{Ni}_3\text{N}$ ,  $\text{Ni}_3\text{N}$ -0.5,  $\text{Ni}_3\text{N}$ -1, and  $\text{Ni}_3\text{N}/\text{CMFs}/\text{Ni}_3\text{N}$ .

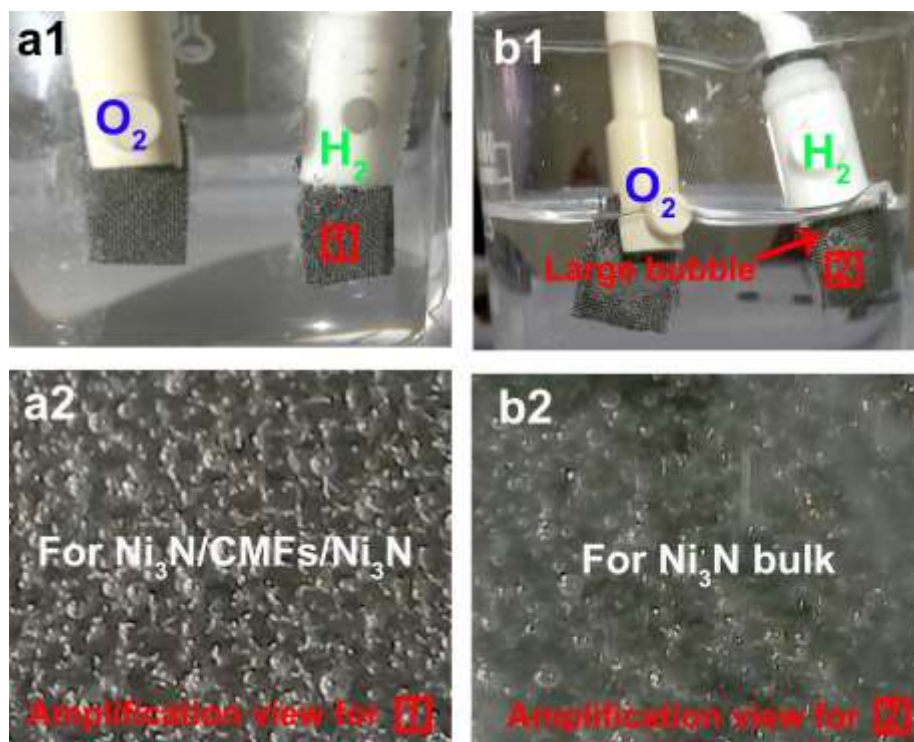

**Figure S19** The digital graphs of the processes in full water splitting of  $\text{Ni}_3\text{N}/\text{CMFs}/\text{Ni}_3\text{N}$  (a1-a2) and bulk  $\text{Ni}_3\text{N}$  (b1-b2). The applied current densities are all  $10 \text{ mA cm}^{-2}$ .

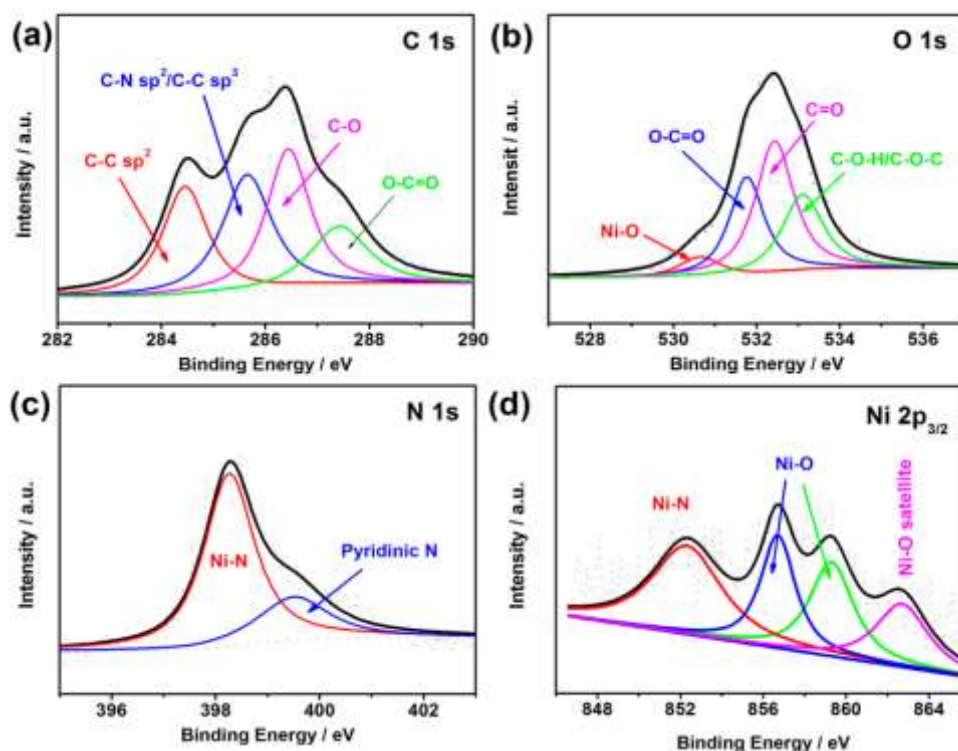

**Figure S20** High-resolution XPS spectra of C 1s (a), O 1s (b), N 1s (c), and Ni 2p (d) for the post-OER  $\text{Ni}_3\text{N}/\text{CMFs}/\text{Ni}_3\text{N}$ .

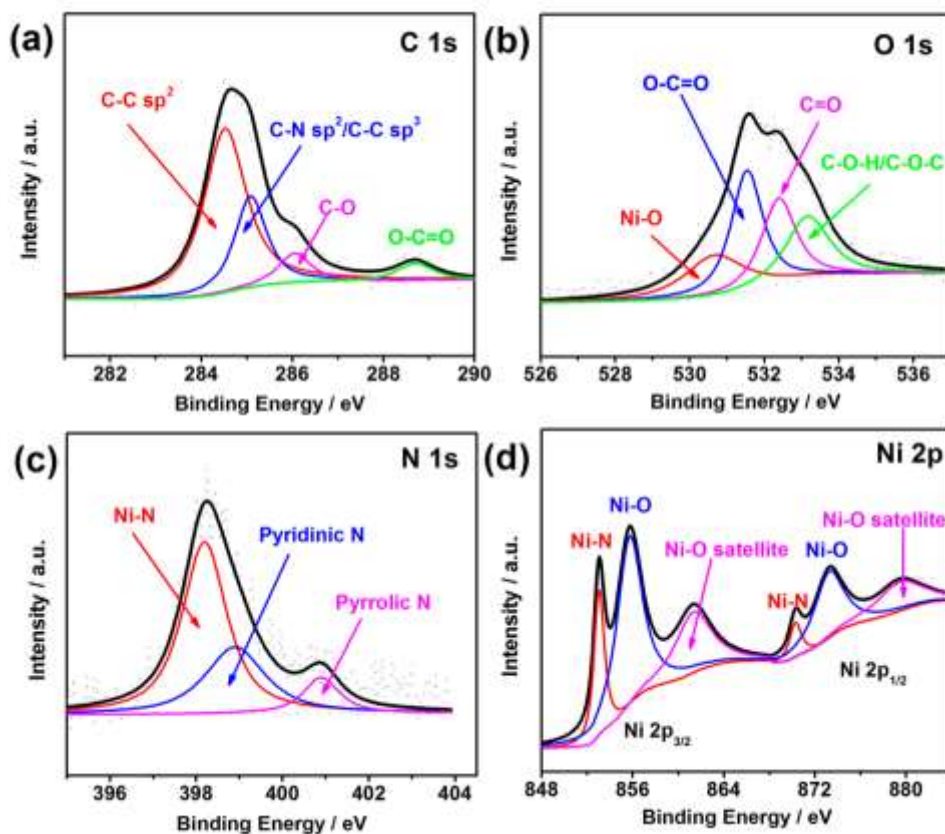

**Figure S21** High-resolution XPS spectra of C 1s (a), O 1s (b), N 1s (c), and Ni 2p (d) for the post-HER  $\text{Ni}_3\text{N}/\text{CMFs}/\text{Ni}_3\text{N}$ .

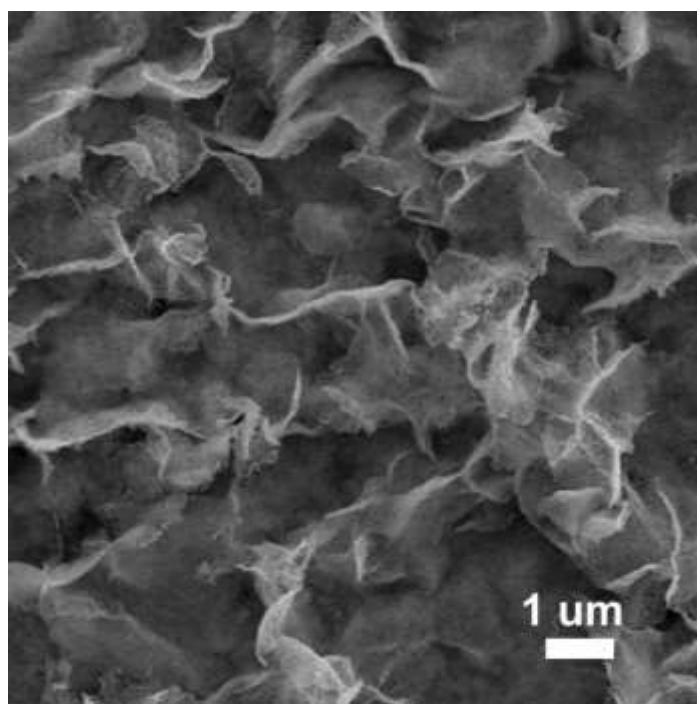

**Figure S22** SEM image of the post-OER  $\text{Ni}_3\text{N}/\text{CMFs}/\text{Ni}_3\text{N}$  collected at positive electrode after the 40 h of water splitting catalysis.

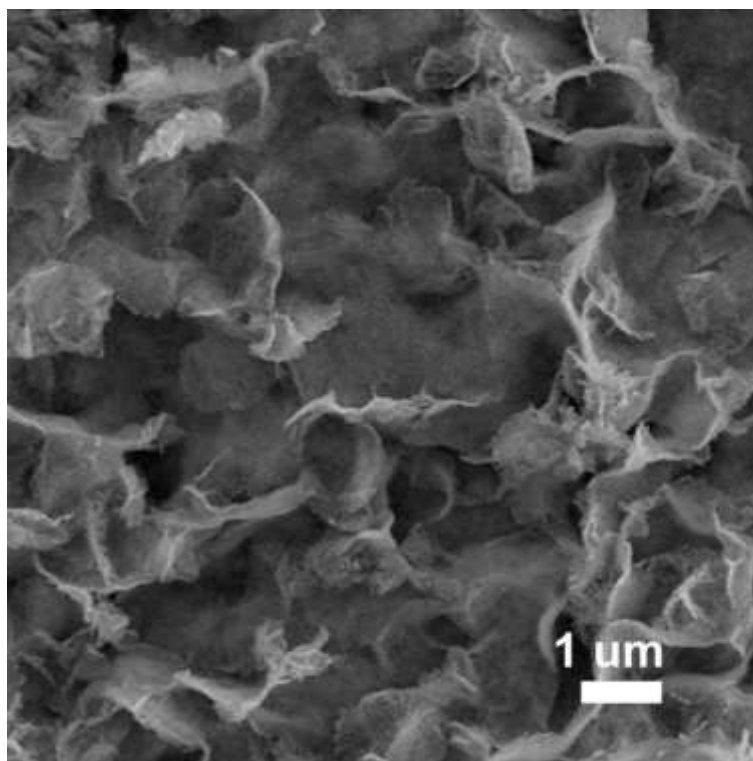

**Figure S23** SEM image of the post-HER Ni<sub>3</sub>N/CMFs/Ni<sub>3</sub>N collected at negative electrode after the 40 h of water splitting catalysis.

**References:**

1. W. S. Hummers and R. E. Offeman, *Journal of the American Chemical Society*, 1958, 80, 1339-1339.
2. L. Yan, X. Bo, Y. Zhang and L. Guo, *Electrochimica Acta*, 2014, 137, 693-699.
3. M. Li, Y. Xiong, X. Liu, C. Han, Y. Zhang, X. Bo and L. Guo, *Journal of Materials Chemistry A*, 2015, 3, 9658-9667.
